# Supplementary material for: Green Fabrication Approaches of Lignin Nanoparticles from Different Technical Lignins: A Comparison Study
Source: PubMed Central journal article supplement (PMC8596756; doi:10.1002/cssc.202101356), 2021-10-04
Supplement: CSSC-14-4718-s001.pdf [file CSSC-14-4718-s001.pdf]

# ChemSusChem

Supporting Information

## **Green Fabrication Approaches of Lignin Nanoparticles from Different Technical Lignins: A Comparison Study**

Patrícia Figueiredo,\* Maarit H. Lahtinen, Melissa B. Agustin, Danila Morais de Carvalho, Sami-Pekka Hirvonen, Paavo A. Penttilä, and Kirsi S. Mikkonen\*© 2021 The Authors.

ChemSusChem published by Wiley-VCH GmbH. This is an open access article under the terms of the Creative Commons Attribution License, which permits use, distribution and reproduction in any medium, provided the original work is properly cited.

## RESULTS AND DISCUSSION

**Table S1.** Molar mass distribution for the different types of lignin (LB, softwood; PB, wheat straw; BB, hardwood).

| Sample                     | LB                     |                        |                                | PB                     |                        |                                | BB                     |                        |                                |
|----------------------------|------------------------|------------------------|--------------------------------|------------------------|------------------------|--------------------------------|------------------------|------------------------|--------------------------------|
|                            | M <sub>n</sub><br>(Da) | M <sub>w</sub><br>(Da) | M <sub>w</sub> /M <sub>n</sub> | M <sub>n</sub><br>(Da) | M <sub>w</sub><br>(Da) | M <sub>w</sub> /M <sub>n</sub> | M <sub>n</sub><br>(Da) | M <sub>w</sub><br>(Da) | M <sub>w</sub> /M <sub>n</sub> |
| <b>Raw Lignin</b>          | 1399                   | 22282                  | 15.9                           | 806                    | 12496                  | 15.5                           | 807                    | 16766                  | 20.8                           |
| <b>70% Ethanol</b>         | 1181                   | 6025                   | 5.1                            | 957                    | 14355                  | 15.0                           | 942                    | 9403                   | 10.0                           |
| <b>Acetone/Water (3:1)</b> | 1451                   | 20225                  | 13.9                           | 877                    | 14174                  | 16.2                           | 831                    | 13150                  | 15.8                           |
| <b>Acid Precipitation</b>  | 1320                   | 13457                  | 10.2                           | 952                    | 12417                  | 13.0                           | 1006                   | 14225                  | 14.1                           |

Abbreviations: M<sub>n</sub>, number-average molecular weight; M<sub>w</sub>, weight-average molecular weight.

**Table S2.** Content in hydroxyl and carboxyl groups of softwood LB and hardwood BB by <sup>31</sup>P nuclear magnetic resonance (<sup>31</sup>P NMR), expressed in mmol/g.

| Samples                                | Aliphatic OH<br>(145–150 ppm) | C5 substituted(LB)/<br>Syringyl(BB)<br>(140–144.5 ppm) | Guaiacyl<br>(139–140 ppm) | <i>p</i> -Hydroxyphenyl<br>(137.8 ppm) | Total Phenolic OH | S/G ratio | COOH<br>(133.6–136 ppm) |
|----------------------------------------|-------------------------------|--------------------------------------------------------|---------------------------|----------------------------------------|-------------------|-----------|-------------------------|
| <b>Raw LB</b>                          | 2.19                          | 1.50                                                   | 1.72                      | 0.10                                   | 3.32              | 0.87      | 0.32                    |
| <b>LB-LNPs</b><br>(70% Ethanol)        | 2.02                          | 1.68                                                   | 2.00                      | 0.11                                   | 3.80              | 0.84      | 0.29                    |
| <b>LB-LNPs</b><br>(Acetone/water 3:1)  | 2.26                          | 1.64                                                   | 1.72                      | 0.10                                   | 3.46              | 0.96      | 0.35                    |
| <b>LB-LNPs</b><br>(Acid precipitation) | 1.72                          | 1.57                                                   | 1.92                      | 0.12                                   | 3.60              | 0.82      | 0.47                    |
| <b>Raw BB</b>                          | 1.04                          | 2.59                                                   | 0.61                      | 0                                      | 3.20              | 4.27      | 0.56                    |
| <b>BB-LNPs</b><br>(70% Ethanol)        | 1.01                          | 2.78                                                   | 0.70                      | 0                                      | 3.48              | 3.97      | 0.53                    |
| <b>BB-LNPs</b><br>(Acetone/water 3:1)  | 1.14                          | 2.65                                                   | 0.68                      | 0                                      | 3.33              | 3.93      | 0.62                    |
| <b>BB-LNPs</b><br>(Acid precipitation) | 1.43                          | 2.07                                                   | 0.47                      | 0                                      | 2.54              | 4.42      | 0.64                    |

**Table S3.** Results of fits of a sphere model with log-normal size distribution to the SAXS intensities.<sup>[1]</sup>

|                                                   | <b>Diameter,<br/>mean (nm)</b> | <b>Diameter,<br/>median (nm)</b> | <b>Diameter,<br/>mode (nm)</b> | <b>Standard<br/>deviation (nm)</b> |
|---------------------------------------------------|--------------------------------|----------------------------------|--------------------------------|------------------------------------|
| <b>LB-LNPs – 70% Ethanol</b><br>(4 mg/ml)         | 43.7                           | 40.9                             | 35.8                           | 16.5                               |
| <b>LB-LNPs – Acetone/Water (3:1)</b><br>(4 mg/ml) | 46.4                           | 44.0                             | 39.6                           | 15.5                               |
| <b>PB-LNPs – 70% Ethanol</b><br>(4 mg/ml)         | 39.6                           | 35.3                             | 28.0                           | 20.1                               |
| <b>PB-LNPs – Acetone/Water (3:1)</b><br>(4 mg/ml) | 69.6                           | 66.4                             | 60.6                           | 21.6                               |
| <b>BB-LNPs – 70% Ethanol</b><br>(4 mg/ml)         | 41.1                           | 36.3                             | 28.3                           | 21.8                               |
| <b>BB-LNPs – Acetone/Water (3:1)</b><br>(4 mg/ml) | 67.5                           | 64.8                             | 59.8                           | 19.6                               |

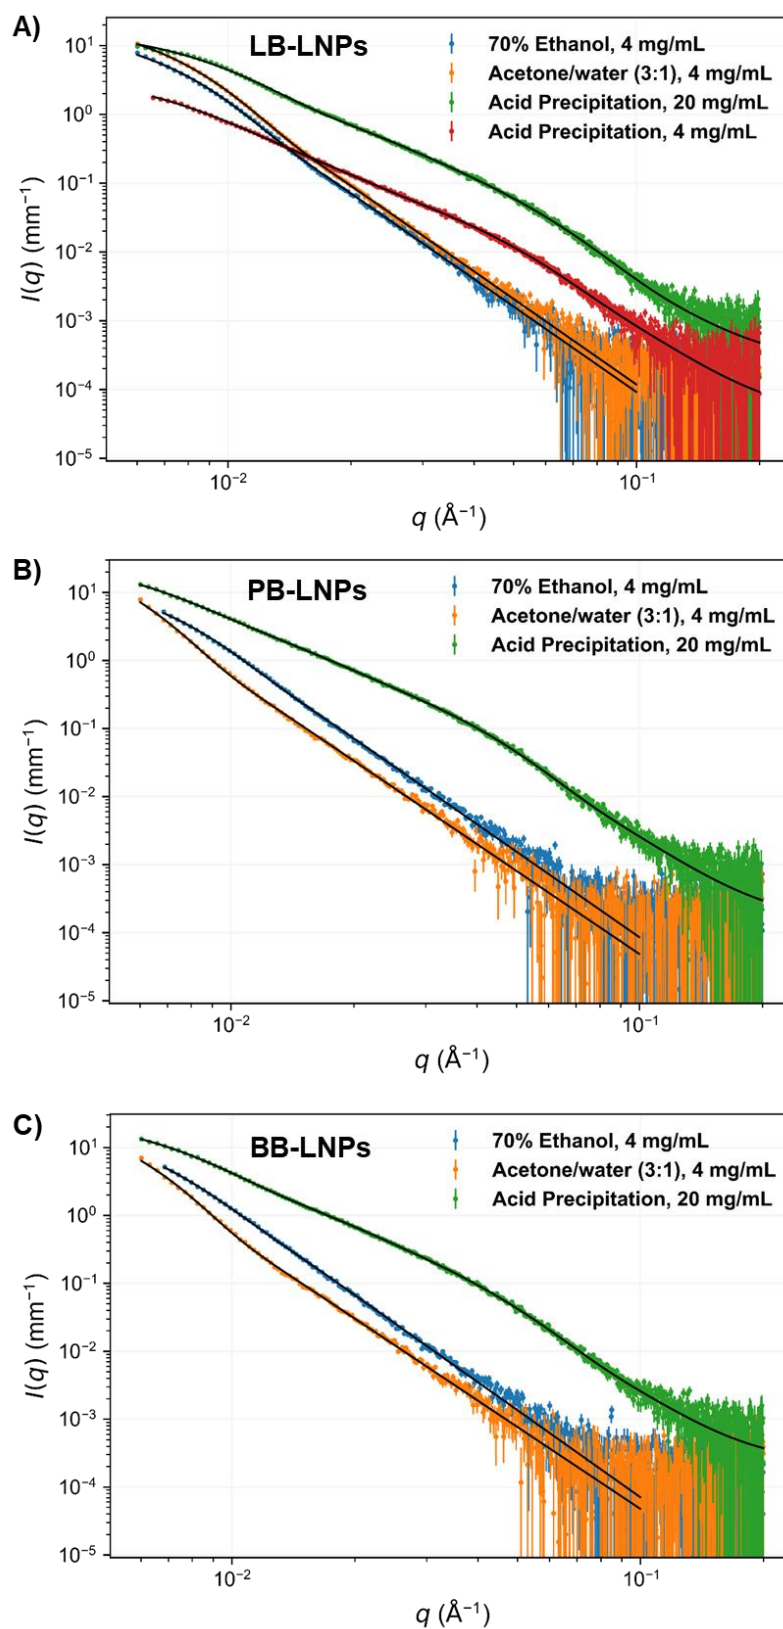

**Figure S1.** SAXS intensities (points) and fits (solid line) of the unified exponential/power-law model with one (Acetone/water 3:1 and 70% Ethanol methods) or two (Acid precipitation approach) levels of structural hierarchy: **A)** LB-LNPs; **B)** PB-LNPs, and **C)** BB-LNPs.

**Table S4.** Results of fits of the unified exponential/power-law model to the SAXS intensities.<sup>[2,3]</sup>

|                                                   | Radius of gyration, level 1 (nm) | Sphere diameter, level 1 (nm) | Radius of gyration, level 2 (nm) | Sphere diameter, level 1 (nm) |
|---------------------------------------------------|----------------------------------|-------------------------------|----------------------------------|-------------------------------|
| <b>LB-LNPs – 70% Ethanol</b><br>(4 mg/ml)         | 29.4                             | 75.9                          | -                                | -                             |
| <b>LB-LNPs – Acetone/Water (3:1)</b><br>(4 mg/ml) | 29.3                             | 75.8                          | -                                | -                             |
| <b>LB-LNPs – Acid Precipitation</b><br>(4 mg/ml)  | 25.4                             | 65.7                          | 4.6                              | 11.8                          |
| <b>LB-LNPs – Acid Precipitation</b><br>(20 mg/ml) | 22.1                             | 57.0                          | 3.4                              | 8.9                           |
| <b>PB-LNPs – 70% Ethanol</b><br>(4 mg/ml)         | 31.0                             | 80.0                          | -                                | -                             |
| <b>PB-LNPs – Acetone/Water (3:1)</b><br>(4 mg/ml) | 43.7                             | 112.9                         | -                                | -                             |
| <b>PB-LNPs – Acid Precipitation</b><br>(20 mg/ml) | 31.0                             | 80.1                          | 5.3                              | 13.7                          |
| <b>BB-LNPs – 70% Ethanol</b><br>(4 mg/ml)         | 34.6                             | 89.4                          | -                                | -                             |
| <b>BB-LNPs – Acetone/Water (3:1)</b><br>(4 mg/ml) | 40.9                             | 105.6                         | -                                | -                             |
| <b>BB-LNPs – Acid Precipitation</b><br>(20 mg/ml) | 28.0                             | 72.2                          | 4.8                              | 12.3                          |

**Table S5.** IR absorption bands and respective type of vibration for the main lignin functional groups.<sup>[4,5]</sup>

| IR band (cm <sup>-1</sup> ) | Type of vibration                                                                                                               |
|-----------------------------|---------------------------------------------------------------------------------------------------------------------------------|
| 3500–3100                   | Stretching vibrations of alcohol and phenol –OH groups involved in hydrogen bonds                                               |
| 2920–2850                   | Stretching vibrations of C–H bonds in methoxy group                                                                             |
| 1720                        | Stretching vibrations of C=O bonds at $\beta$ location and in unconjugated –COOH group                                          |
| 1600                        | Stretching vibrations of C=O bonds at $\alpha$ - and $\gamma$ -locations                                                        |
| 1512                        | Aromatic ring vibrations                                                                                                        |
| 1465                        |                                                                                                                                 |
| 1427                        |                                                                                                                                 |
| 1330                        | Syringyl ring breathing and stretching vibrations of C–O bonds                                                                  |
| 1230                        |                                                                                                                                 |
| 1270                        | Vibrations of guaiacyl rings and stretching vibrations of C–O bonds                                                             |
| 1150                        | Deformation vibrations of C–H bonds in guaiacyl rings                                                                           |
| 1130                        | Deformation vibrations of C–H bonds in syringyl rings                                                                           |
| 1085                        | Deformation vibrations of C–O bonds in secondary alcohols and aliphatic ethers                                                  |
| 1030                        | Deformation vibrations of C–H bonds in the aromatic guaiacyl rings, and deformation vibrations of C–O bonds in primary alcohols |
| 860-750                     | Deformation vibrations of C–H bonds in the aromatic rings (guaiacyl, syringyl)                                                  |

**Table S6.** Assignment for the carbon-hydrogen correlation signals of lignin structures in BB, LB, and PB lignins.<sup>[3,6-9]</sup>

| Structural units                            | $\delta_C$ (ppm) | $\delta_H$ (ppm) | Assignments                                                                  | Identified in |
|---------------------------------------------|------------------|------------------|------------------------------------------------------------------------------|---------------|
| Syringyl (S <sub>2,6</sub> )                | 103.6            | 6.68             | C <sub>2</sub> /H <sub>2</sub> and C <sub>6</sub> /H <sub>6</sub> in S-units | BB, PB        |
| Guaiacyl (G <sub>2</sub> )                  | 110.9            | 7.14             | C <sub>2</sub> /H <sub>2</sub> in G-units                                    | BB, LB, PB    |
| Guaiacyl (G <sub>5</sub> )                  | 115.5            | 6.75             | C <sub>5</sub> /H <sub>5</sub> in G-units                                    | BB, LB, PB    |
| Guaiacyl (G <sub>6</sub> )                  | 119.5            | 6.93             | C <sub>6</sub> /H <sub>6</sub> in G-units                                    | BB, LB, PB    |
| <i>p</i> -hydroxyphenyl (H <sub>2,6</sub> ) | 127.5            | 7.21             | C <sub>2</sub> /H <sub>2</sub> and C <sub>6</sub> /H <sub>6</sub> in H-units | BB, LB, PB    |
| $\beta$ -aryl ether ( $\beta$ -O-4)         | <b>71.0</b>      | <b>4.75</b>      | $\beta$ -O-4 signal in $\alpha$                                              | LB, PB        |
| $\beta$ -aryl ether ( $\beta$ -O-4)         | 84.2             | 4.26             | $\beta$ -O-4 signal in $\beta$                                               | LB, PB        |
| $\beta$ -aryl ether ( $\beta$ -O-4)         | 59.9             | 3.24-3.60        | $\beta$ -O-4 signal in $\gamma$                                              | LB, PB        |
| Phenylcoumaran ( $\beta$ -5)                | <b>86.8</b>      | <b>5.45</b>      | $\beta$ -5 signal in $\alpha$                                                | LB, PB        |
| Phenylcoumaran ( $\beta$ -5)                | 53.4             | 3.45             | $\beta$ -5 signal in $\beta$                                                 | LB, PB        |
| Phenylcoumaran ( $\beta$ -5)                | 62.9             | 3.71             | $\beta$ -5 signal in $\gamma$                                                | LB, PB, BB    |
| Dibenzodioxocin (5-5)                       | 82.9             | 4.81             | 5-5/ $\beta$ -O-4 signal in $\alpha$                                         | BB, PB        |
| Resinol ( $\beta$ - $\beta$ )               | <b>85.1</b>      | <b>4.61</b>      | $\beta$ - $\beta$ signal in $\alpha$                                         | LB, PB, BB    |
| Resinol ( $\beta$ - $\beta$ )               | 53.6             | 3.04             | $\beta$ - $\beta$ signal in $\beta$                                          | LB, PB, BB    |
| Resinol ( $\beta$ - $\beta$ )               | 71.0             | 4.14; 3.77       | $\beta$ - $\beta$ signal in $\gamma$                                         | LB, PB, BB    |
| Secoisolariciresinol                        | 33.8             | 2.53/2.48        | Secoisolariciresinol in $\alpha$                                             | LB, PB        |
| Secoisolariciresinol                        | <b>42.4</b>      | <b>1.88</b>      | Secoisolariciresinol in $\beta$                                              | LB, PB        |
| Methoxyl group                              | 55.5             | 3.75-3.82        | C/H in -OMe in G- and S-units                                                | LB, PB, BB    |

**Table S7.** Assignment for the relevant carbon-hydrogen correlation signals of polysaccharides linkages identified in BB, LB, and PB lignins.<sup>[9,10]</sup>

| Structural units                   | $\delta_C$ (ppm) | $\delta_H$ (ppm) | Assignments <sup>a</sup>                                                               | Identified in |
|------------------------------------|------------------|------------------|----------------------------------------------------------------------------------------|---------------|
| Ara <sub>1</sub>                   | 107.8            | 4.76             | C <sub>1</sub> /H <sub>1</sub> in $\beta$ -L-arabinopyranoside                         | LB            |
| Ara <sub>5</sub>                   | 62.3             | 3.42/3.36        | C <sub>5</sub> /H <sub>5</sub> in $\beta$ -L-arabinopyranoside                         | BB, LB        |
| Glc <sub>1</sub>                   | 102.0            | 4.32             | C <sub>1</sub> /H <sub>1</sub> in $\beta$ -D-glucopyranoside                           | BB, LB, PB    |
| Glc <sub>6</sub> /Man <sub>6</sub> | 60.0             | 3.59             | C <sub>6</sub> /H <sub>6</sub> in $\beta$ -D-glucopyranoside                           | LB, PB        |
| Xyl <sub>1</sub>                   | 101.5            | 4.38             | C <sub>1</sub> /H <sub>1</sub> in $\beta$ -D-xylopyranoside                            | LB, BB, PB    |
| Xyl <sub>2</sub>                   | 72.7             | 3.03             | C <sub>2</sub> /H <sub>2</sub> in $\beta$ -D-xylopyranoside                            | BB, LB, PB    |
| Xyl <sub>2</sub> (r <sub>a</sub> ) | 69.7             | 3.27             | C <sub>2</sub> /H <sub>2</sub> in $\beta$ -D-xylopyranoside of xylans reduction end    | BB, PB        |
| Xyl <sub>2</sub> -Ac               | 73.0             | 4.40             | C <sub>2</sub> /H <sub>2</sub> in 2-O-acetyl- $\beta$ -D-xylopyranoside                | BB, PB        |
| Xyl <sub>3</sub>                   | 74.5             | 3.28             | C <sub>3</sub> /H <sub>3</sub> in $\beta$ -D-xylopyranoside                            | BB, LB, PB    |
| Xyl <sub>4</sub>                   | 75.7             | 3.51             | C <sub>4</sub> /H <sub>4</sub> in $\beta$ -D-xylopyranoside                            | BB, LB, PB    |
| Xyl <sub>5</sub>                   | 62.8             | 3.78/3.17        | C <sub>5</sub> /H <sub>5</sub> in $\beta$ -D-xylopyranoside                            | BB, LB, PB    |
| Xyl <sub>4</sub> (nr)              | 66.0             | 3.31             | C <sub>4</sub> /H <sub>4</sub> in $\beta$ -D-xylopyranoside of xylans non-reducing end | LB, PB        |
| Man <sub>3</sub>                   | 76.6             | 3.08             | C <sub>3</sub> /H <sub>3</sub> in $\beta$ -D- mannopyranoside                          | BB, PB        |
| Man <sub>3</sub> -Ac               | 73.0             | 4.82             | C <sub>3</sub> /H <sub>3</sub> in 3-O-acetyl- $\beta$ -D- mannopyranoside              | BB            |
| Man <sub>4</sub>                   | 79.3             | 3.38             | C <sub>4</sub> /H <sub>4</sub> in $\beta$ -D- mannopyranoside                          | BB            |
| Gal <sub>1</sub>                   | 105.0            | 4.26             | C <sub>1</sub> /H <sub>1</sub> in $\beta$ -D-galactopyranoside                         | LB            |

## References

- [1] M. H. Sipponen, A. Henn, P. Penttilä, M. Österberg, *Chem. Eng. J.* **2020**, *393*, 124711.
- [2] G. Beaucage, *J. Appl. Crystallogr.* **1995**, *28*, 717.
- [3] M. B. Agustin, P. A. Penttilä, M. Lahtinen, K. S. Mikkonen, *ACS Sustain. Chem. Eng.* **2019**, *7*, 19925.
- [4] B. Ahvazi, É. Cloutier, O. Wojciechowicz, T. D. Ngo, *ACS Sustain. Chem. Eng.* **2016**, *4*, 5090.
- [5] P. Figueiredo, C. Ferro, M. Kemell, Z. Liu, A. Kiriazis, K. Lintinen, H. F. Florindo, J. Yli-Kauhaluoma, J. Hirvonen, M. A. Kostianen, H. A. Santos, *Nanomedicine* **2017**, *12*, DOI 10.2217/nnm-2017-0219.
- [6] T. M. Liitiä, S. L. Maunu, B. Hortling, M. Toikka, I. Kilpeläinen, *J. Agric. Food Chem.* **2003**, *51*, 2136.
- [7] C. S. Lancefield, H. J. Wienk, R. Boelens, B. M. Weckhuysen, P. C. A. Bruijninx, *Chem. Sci.* **2018**, *9*, 6348.
- [8] L. Lagerquist, A. Pranovich, A. Smeds, S. von Schoultz, L. Vähäsalo, J. Rahkila, I. Kilpeläinen, T. Tamminen, S. Willför, P. Eklund, *Ind. Crops Prod.* **2018**, *111*, 306.
- [9] J. Rencoret, A. Gutiérrez, L. Nieto, J. Jiménez-Barbero, C. B. Faulds, H. Kim, J. Ralph, Á. T. Martínez, J. C. del Río, *Plant Physiol.* **2011**, *155*, 667.
- [10] N. Giummarella, M. Lawoko, *ACS Sustain. Chem. Eng.* **2017**, *5*, 5156.
